# Supplementary material for: Cancer-Testis Gene Expression in Hepatocellular Carcinoma: Identification of Prognostic Markers and Potential Targets for Immunotherapy
Source: PubMed Central journal article supplement — Technol Cancer Res Treat. 2020 Jul 27;19:1533033820944274. doi: 10.1177/1533033820944274 (PMC7453447; doi:10.1177/1533033820944274), 2020-07-27
Supplement: supplementary_materials.pdf [file supplementary_materials.pdf]

**Title:** Cancer-testis Gene Expression in Hepatocellular Carcinoma: Identification of Prognostic Markers and Potential Targets for Immunotherapy

**Supplementary file name:**

Supplementary Data 1A. List of 255 CT genes from the CT-database.

Supplementary Data 1B. List of 21 CT genes from the CT-database that have been excluded.

Supplementary Data 2. List of 2121 CT genes from four combined database.

Supplementary Data 3. List of genes with expression bias to the testis.

Supplementary Data 4. List of up-regulation genes in HCC from TCGA.

Supplementary Data 5. List of combined data of 59 putative CT genes in HCC.

Supplementary Data 6. Methylation status of promoter region of 59 CT genes in HCC compared with normal tissue.

**Supplementary Table 1. Primers used in our analysis.**

**Supplementary Figure 1. Analysis of demethylation on the regulation of BUB1B in HCC cell lines.**

- A. The relative BUB1B mRNA expression levels in five HCC cell lines.
- B. qRT-PCR showed that AZA treatment significantly increased the expression of BUB1B mRNA levels in Huh7 and HCCLM3 cells (\*\* $p < 0.01$ , \*\*\* $p < 0.001$ ).
