# Supplementary material for: Cancer-Testis Gene Expression in Hepatocellular Carcinoma: Identification of Prognostic Markers and Potential Targets for Immunotherapy
Source: PubMed Central journal article supplement — Technol Cancer Res Treat. 2020 Jul 27;19:1533033820944274. doi: 10.1177/1533033820944274 (PMC7453447; doi:10.1177/1533033820944274), 2020-07-27
Supplement: Supplementary_table_1_(1).pdf [file Supplementary_table_1_%281%29.pdf]

Supplementary table 1. Primers used in our analysis.

| Gene  |         | Primers                 |
|-------|---------|-------------------------|
| GAPDH | Forward | GACAAGCTTCCCGTTCTCAG    |
|       | Reverse | GAGTCAACGGATTTGGTCGT    |
| BUB1B | Forward | AAATGACCCTCTGGATGTTTGG  |
|       | Reverse | GCATAAACGCCCTAATTTAAGCC |
